# Supplementary material for: A Boolean Network Approach to Estrogen Transcriptional Regulation
Source: Hindawi journal article supplement (doi:10.1155/2019/8740279), 2019-01-01
Supplement: f1 [file 8740279.f1.zip]

Archive with 15 entries (14 files):
- 8740279.f1/
- 8740279.f1/AR.txt
- 8740279.f1/BRCA1.txt
- 8740279.f1/CREBBP.txt
- 8740279.f1/E2F1.txt
- 8740279.f1/ESR1.txt
- 8740279.f1/ESR2.txt
- 8740279.f1/HIF1A.txt
- 8740279.f1/JUN.txt
- 8740279.f1/MYC.txt
- 8740279.f1/RARA.txt
- 8740279.f1/SMAD4.txt
- 8740279.f1/SP1.txt
- 8740279.f1/STAT5A.txt
- 8740279.f1/TP53.txt
