# Supplementary material for: A Boolean Network Approach to Estrogen Transcriptional Regulation
Source: Hindawi journal article supplement (doi:10.1155/2019/8740279), 2019-01-01
Supplement: f1 [file 8740279.f1.zip › 8740279.f1/AR.txt]

AR
3
SMAD4	AR	BRCA1	AR
0	0	0	0
1	0	0	0
0	1	0	0
1	1	0	0
0	0	1	1
1	0	1	0
0	1	1	0
1	1	1	0
