# Supplementary material for: A Boolean Network Approach to Estrogen Transcriptional Regulation
Source: Hindawi journal article supplement (doi:10.1155/2019/8740279), 2019-01-01
Supplement: f1 [file 8740279.f1.zip › 8740279.f1/BRCA1.txt]

BRCA1
1
BRCA1	BRCA1
0	0
1	1
