# Supplementary material for: A Boolean Network Approach to Estrogen Transcriptional Regulation
Source: Hindawi journal article supplement (doi:10.1155/2019/8740279), 2019-01-01
Supplement: f2 [file 8740279.f2.xlsx]

## Sheet: Sheet1
GENE	CONTRIBUTION	EVIDENCE(PMID)	Gene DB	Ghr DB	Former
AR	PRO	28324045;25867062;22922989;12069693;16921507	pro	NA	Pro
BRCA1	ANTI	26902145;15199145;16522651;24775809;28536297	NA	anti	Anti
CREBBP	PRO	29884215;29217654;30114346	pro	pro	Pro
E2F1	ANTI	29115436;24891616	anti	NA	Anti	may be pro in some contexts
ESR1	PRO	27178332;28827707;28578502	pro	pro	Pro
ESR2	PRO	26861465;29328407	?	NA	Anti
HIF1A	PRO	29275212;28543639;28739726	pro	NA	Pro
JUN	PRO	9878062;14691341	pro	NA	Pro
MYC	PRO	18177721;24731854;19773439	pro	pro	Pro
RARA	PRO	30335887;25961594	pro	pro	Pro
SMAD4	ANTI	28631567;29331421;28924364	anti	anti	Anti
SP1	PRO	28209205;23959823;29039575	pro	NA	Pro
STAT5A	PRO	28202313;28034671;15947484	pro	NA	Anti
TP53	anti	27776972;29187402;29581288	anti	anti	Anti
						(X[Title/Abstract]) AND ((proliferation OR "cell growth"))	Pubmed query
						search for X, then search the text for “growth” or “proliferation”	Gene and GHR queries
						X (proliferation OR "cell growth")	Duckduckgo query
